# Supplementary material for: Hepatitis B virus reactivation and antiviral prophylaxis during lung cancer chemotherapy: A systematic review and meta-analysis
Source: PLoS One. 2017 Jun 22;12(6):e0179680. doi: 10.1371/journal.pone.0179680 (PMC5480953; doi:10.1371/journal.pone.0179680)
Supplement: S1 Table — (XLSX) [file pone.0179680.s006.xlsx]

## Sheet: Sheet1
Supplement 1 table: The results for primary and secondary outcomes of the clinical studies.
Study, Year (Reference)	Group (P/C)	HBV reactivation(P/C)	Hepatitis *(P/C)			Chemo disruption†(P/C)			Mortality(P/C)
Alexopoulos et al, 1999	NR/14	NR/2	NR			NR			NR
Che et al, 2014	80/80	4/20	14/36			4/16			0/0
Duan et al, 2009	30/30	2/8	NR			3/10			NR
Eren et al, 2009	7/4	0/1	NR			NR			NR
Lin et al, 2014	82/176	5/34	5/34			NR			0/4
Nishida et al, 2013	NR/2	NR/0	NR			NR			NR
Yan et al, 2012	33/43	1/9	NR			NR			NR
Yeo et al, 2000	NR/8	NR/3	NR			NR			NR
Yeo et al, 2004	NR/13	NR/3	NR			NR			NR
Zheng et al, 2014	59/63	1/12	0/3			0/1			92
Zheng et al, 2016	35/35	2/8	NR			3/9			NR
P=prophylaxis group; C=control group; HBV=hepatic B virus; chemo=chemotherapy; NR=not reported; †chemotherapy disruption includes delay of chemotherapy and premature termination.
